# Supplementary material for: Inferring Drug-Protein–Side Effect Relationships from Biomedical Text
Source: MDPI journal article supplement (doi:10.3390/genes10020159), 2019-02-19
Supplement: s1 [file s1]

## Path1(Type2) and Path2(Type3)

## Associate?

# AGE?

## Differ?

# anastrozole

**observe**

## Androgen receptor (ar)

➤ **decrease**

 **MUC5AC**

# Use?

## Use

## Polymerase?

## RT-PCR

## Suggest?

## Suggest

## acute hepatitis



# path 15(Type2)
