# Supplementary material for: Inferring Drug-Protein–Side Effect Relationships from Biomedical Text
Source: Genes (Basel). 2019 Feb 19;10(2):159. doi: 10.3390/genes10020159 (PMC6409686; doi:10.3390/genes10020159)
Supplement: Supplementary file 1 [file genes-10-00159-s001.zip › supplementary/supplementary(ranking_function_result).xlsx]

## Sheet: COALS
Rank	Drug	Protein1	Protein2	Protein3	SideEffect	COALS_Score	Type1	Type2	Type3
1	doxorubicin	il-6	clec-2	podoplanin	leukoplakia	0.226285		O
2	methotrexate	ts	kinesin-2	rod	nocardiosis	0.217159			O
3	methotrexate	lp	nrl	rod	nocardiosis	0.104667			O
4	bortezomib	p38	g17	gastrin	dyspepsia	0.066827	O
5	sorafenib	p38	g17	gastrin	dyspepsia	0.064193	O
6	nilotinib	p38	g17	gastrin	dyspepsia	0.063151		O
7	doxorubicin	p38	g17	gastrin	dyspepsia	0.063092	O
8	tamoxifen	p38	g17	gastrin	dyspepsia	0.062585	O
9	irinotecan	p38	g17	gastrin	dyspepsia	0.060643	O
10	chlorambucil	p53	l3mbtl1	erythropoietin	ureteral obstruction	0.049178		O
11	cetrorelix	egf	p15	smad4	septal defect	0.048212		O
12	nilotinib	p38	mao-a	ssao	intracranial hemorrhage	0.01352	O
13	methotrexate	cr	cofilin-1	rod	nocardiosis	0.012822			O
14	bortezomib	p53	p150	cd5	glomerulonephropathy	0.011829			O
15	gemcitabine	il-2	gls	glutaminase	nervous system disorders	0.010049			O
16	cetrorelix	pcna	p15	smad4	septal defect	0.008793		O
17	bortezomib	protein kinase	p150	cd5	glomerulonephropathy	0.003483			O
18	cisplatin	tnf-alpha	spo	lipase	hypophosphatemia	-0.002259		O
19	anastrozole	age	muc5ac	polymerase	acute hepatitis	-0.002675			O
20	anastrozole	ar	muc5ac	polymerase	acute hepatitis	-0.007588		O

## Sheet: Co-occurrence
Rank	Drug	Protein1	Protein2	Protein3	SideEffect	Co_occurrence	Type1	Type2	Type3
1	bortezomib	p53	p150	cd5	glomerulonephropathy	20			O
2	cisplatin	tnf-alpha	spo	lipase	hypophosphatemia	18		O
3	bortezomib	p38	g17	gastrin	dyspepsia	9	O
4	cetrorelix	egf	p15	smad4	septal defect	9		O
5	doxorubicin	il-6	clec-2	podoplanin	leukoplakia	9		O
6	doxorubicin	p38	g17	gastrin	dyspepsia	9	O
7	methotrexate	cr	cofilin-1	rod	nocardiosis	7			O
8	methotrexate	lp	nrl	rod	nocardiosis	7			O
9	sorafenib	p38	g17	gastrin	dyspepsia	7	O
10	chlorambucil	p53	l3mbtl1	erythropoietin	ureteral obstruction	6		O
11	nilotinib	p38	g17	gastrin	dyspepsia	6		O
12	nilotinib	p38	mao-a	ssao	intracranial hemorrhage	6	O
13	tamoxifen	p38	g17	gastrin	dyspepsia	6	O
14	gemcitabine	il-2	gls	glutaminase	nervous system disorders	5			O
15	irinotecan	p38	g17	gastrin	dyspepsia	5	O
16	methotrexate	ts	kinesin-2	rod	nocardiosis	5			O
17	anastrozole	age	muc5ac	polymerase	acute hepatitis	4			O
18	anastrozole	ar	muc5ac	polymerase	acute hepatitis	4		O
19	bortezomib	protein kinase	p150	cd5	glomerulonephropathy	4			O
20	cetrorelix	pcna	p15	smad4	septal defect	4		O

## Sheet: UMLS
Rank	Drug	Protein1	Protein2	Protein3	SideEffect	UMLS_Score	Type1	Type2	Type3
1	methotrexate	lp	nrl	rod	nocardiosis	0.725161			O
2	gemcitabine	il-2	gls	glutaminase	nervous system disorders	0.725149			O
3	methotrexate	ts	kinesin-2	rod	nocardiosis	0.61449			O
4	chlorambucil	p53	l3mbtl1	erythropoietin	ureteral obstruction	0.542776		O
5	anastrozole	ar	muc5ac	polymerase	acute hepatitis	0.517633		O
6	bortezomib	protein kinase	p150	cd5	glomerulonephropathy	0.494825			O
7	cetrorelix	egf	p15	smad4	septal defect	0.494652		O
8	anastrozole	age	muc5ac	polymerase	acute hepatitis	0.481642			O
9	tamoxifen	p38	g17	gastrin	dyspepsia	0.435871	O
10	doxorubicin	p38	g17	gastrin	dyspepsia	0.434648	O
11	irinotecan	p38	g17	gastrin	dyspepsia	0.433855	O
12	nilotinib	p38	g17	gastrin	dyspepsia	0.433855		O
13	sorafenib	p38	g17	gastrin	dyspepsia	0.433855	O
14	cetrorelix	pcna	p15	smad4		0.42621		O
15	bortezomib	p38	g17	gastrin	dyspepsia	0.425389	O
16	cisplatin	tnf-alpha	spo	lipase	hypophosphatemia	0.409621		O
17	bortezomib	p53	p150	cd5	glomerulonephropathy	0.38463			O
18	methotrexate	cr	cofilin-1	rod	nocardiosis	0.340378			O
19	doxorubicin	il-6	clec-2	podoplanin	leukoplakia	0.323602		O
20	nilotinib	p38	mao-a	ssao	intracranial hemorrhage	0.236812	O

## Sheet: Our-method
Rank	Drug	Protein1	Protein2	Protein3	Side Effect	Score	Type1	Type2	Type3
1	anastrozole	ar	muc5ac	polymerase	acute hepatitis	1.19757		O
2	anastrozole	age	muc5ac	polymerase	acute hepatitis	1.17388			O
3	irinotecan	p38	g17	gastrin	dyspepsia	1.16235	O
4	tamoxifen	p38	g17	gastrin	dyspepsia	1.16059	O
5	doxorubicin	p38	g17	gastrin	dyspepsia	1.15946	O
6	nilotinib	p38	g17	gastrin	dyspepsia	1.15908	O
7	sorafenib	p38	g17	gastrin	dyspepsia	1.15773	O
8	bortezomib	p38	g17	gastrin	dyspepsia	1.15379	O
9	bortezomib	protein kinase	p150	cd5	glomerulonephropathy	1.13951			O
10	cetrorelix	egf	p15	smad4	septal defect	1.13028		O
11	cetrorelix	pcna	p15	smad4	septal defect	1.12713		O
12	bortezomib	p53	p150	cd5	glomerulonephropathy	1.07925			O
13	gemcitabine	il-2	gls	glutaminase	nervous system disorders	1.05944			O
14	doxorubicin	il-6	clec-2	podoplanin	leukoplakia	1.04989		O
15	nilotinib	p38	mao-a	ssao	intracranial hemorrhage	1.02707		O
16	cisplatin	tnf-alpha	spo	lipase	hypophosphatemia	1.00243		O
17	methotrexate	lp	nrl	rod	nocardiosis	0.991961			O
18	chlorambucil	p53	l3mbtl1	erythropoietin	ureteral obstruction	0.964188		O
19	methotrexate	ts	kinesin-2	rod	nocardiosis	0.903429			O
20	methotrexate	cr	cofilin-1	rod	nocardiosis	0.846743			O

## Sheet: P@N
* Ranking Fucntion : COALS
N	Type1	Type2	Type3	Type1+Type2	P@N (type1=True)	P@N (type1+type2=True)
5	2	1	2	3	0.4	0.6
10	5	4	2	9	0.5	0.9
15	6	4	5	10	0.4	0.666667
20	6	7	7	13	0.3	0.65
* Ranking Fucntion : Co-occurrence
N	Type1	Type2	Type3	Type1+Type2	P@N (type1=True)	P@N (type1+type2=True)
5	1	3	1	4	0.2	0.8
10	3	4	3	7	0.3	0.7
15	6	5	4	11	0.4	0.733333
20	6	7	7	13	0.3	0.65
* Ranking Fucntion : UMLS
N	Type1	Type2	Type3	Type1+Type2	P@N (type1=True)	P@N (type1+type2=True)
5	0	2	3	2	0	0.4
10	2	3	5	5	0.2	0.5
15	5	5	5	10	0.333333	0.666667
20	6	7	7	13	0.3	0.65
* Ranking Fucntion : Our method
N	Type1	Type2	Type3	Type1+Type2	P@N (type1=True)	P@N (type1+type2=True)
5	3	1	1	4	0.6	0.8
10	6	2	2	8	0.6	0.8
15	6	5	4	11	0.4	0.733333
20	6	7	7	13	0.3	0.65
